# Supplementary material for: Effect of Procurement Practices on Medicine Procurement Effectiveness in Tanzania’s Regional Referral Hospitals: Evidence from Mwananyamala, Amana, and Temeke Hospitals
Source: Research Square preprint supplement (doi:10.21203/rs.3.rs-8141502/v1), 2025-12-16
Supplement: Supplementary file 1 [file 68a5faeaca6ab593c6122a1c.docx]

**I: QUESTIONNAIRE**

My name is Justine F Nangu**,** currently, I am pursuing Procurement and Supplies Professionals and Technicians Board (PSPTB) examinations. In partial fulfillment of the requirements for the certification, I am required to conduct research in an area of my interest. My interest in this study is **to ascertain the effect of procurement practices on medicine procurement effectiveness in Tanzania: A Case Study of Regional Hospitals in Dar es Salaam.** You have been sampled to participate in this study and the information you give will be used strictly for academic purposes and will never be used against you or your office. The information obtained from you will be kept highly confidential. You are also requested not to write your name on this questionnaire. Kindly fill out the questionnaire and return to me.

Thank you for your cooperation.

**Section A: Demographic Information**

1. Gender: Male ☐ Female ☐
2. Please indicate the highest level of education attained. (Tick as applicable)

Certificate

Diploma

Undergraduate/ degree

Masters

Others (specify)

………………………………………………………………………..

1. Indicate your period of service in the organization

0 to 1 year 2 to 4 years 5 years and above
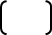


1. **Which hospital are coming from?**

**Section B:**

1. **The effect of procurement planning on medicine procurement effectiveness in Tanzania Regional Hospitals**

Kindly indicate your level of agreement with the following statements on the effect of procurement planning on medicine procurement effectiveness in Tanzania Regional Hospitals. Key Use a scale of 1-5, where **(1= strongly disagree, 2= disagree, 3= Neutral, 4= Agree and 5= strongly Agree).**

| **No.** | **Statement** | **1** | **2** | **3** | **4** | **5** |
| --- | --- | --- | --- | --- | --- | --- |
| 1. | The hospital’s procurement plan reflects actual medicine consumption needs, reducing stock-outs. |  |  |  |  |  |
| 2. | Accurate needs assessment has improved availability of essential medicines. |  |  |  |  |  |
| 3. | Adequate budget allocation for medicines has improved the availability of quality drugs. |  |  |  |  |  |
| 4. | Proper budget forecasting has helped the hospital minimize procurement costs. |  |  |  |  |  |
| 5. | Adherence to procurement timelines ensures timely delivery of essential medicines. |  |  |  |  |  |
| 6. | Proper procurement scheduling has enhanced the hospital’s ability to avoid medicine shortages. |  |  |  |  |  |

1. **The effect of supplier selection and evaluation on medicine procurement effectiveness in Tanzania Regional Hospitals**

Kindly indicate your level of agreement with the following statements on the effect of supplier selection and evaluation on medicine procurement effectiveness in Tanzania Regional Hospitals. Key Use a scale of 1-5, where (1= strongly disagree, 2= disagree, 3= Neutral, 4= Agree and 5= strongly Agree).

| **No.** | **Statement** | **1** | **2** | **3** | **4** | **5** |
| --- | --- | --- | --- | --- | --- | --- |
| 1. | Selecting prequalified suppliers ensures the supply of quality-assured medicines. |  |  |  |  |  |
| 2. | Compliance with regulatory standards by suppliers has improved medicine availability |  |  |  |  |  |
| 3. | Evaluating supplier performance has improved the timeliness of medicine deliveries. |  |  |  |  |  |
| 4. | Supplier performance monitoring has reduced the risk of receiving substandard medicines. |  |  |  |  |  |
| 5. | Fair supplier selection processes have contributed to cost-efficient medicine procurement. |  |  |  |  |  |
| 6. | Transparent supplier evaluation has improved trust and reliability in medicine procurement. |  |  |  |  |  |

1. **The effect of contract management on medicine procurement effectiveness in Tanzania Regional Hospitals**

Kindly indicate your level of agreement with the following statements on the effect of contract management on medicine procurement effectiveness in Tanzania Regional Hospitals. Key Use a scale of 1-5, where (1= strongly disagree, 2= disagree, 3= Neutral, 4= Agree and 5= strongly Agree)

| No. | Statement | 1 | 2 | 3 | 4 | 5 |
| --- | --- | --- | --- | --- | --- | --- |
| 1. | Monitoring supplier compliance with contracts has ensured timely availability of medicines. |  |  |  |  |  |
| 2. | Effective contract monitoring has minimized medicine stock-outs in this hospital. |  |  |  |  |  |
| 3. | Timely payments to suppliers have ensured uninterrupted supply of medicines. |  |  |  |  |  |
| 4. | Efficient financial management in contracts has helped control medicine procurement costs. |  |  |  |  |  |
| 5. | Proper dispute resolution mechanisms have improved the quality of medicines supplied. |  |  |  |  |  |
| 6. | Risk management practices in contracts have reduced procurement delays and stock-outs. |  |  |  |  |  |

**Section C: Medicine procurement effectiveness**

1. Kindly indicate your level of agreement with the following statements relating to medicine procurement effectiveness. Key Use a scale of 1-5, where **(1=**
2. **strongly disagree, 2= disagree, 3= Neutral, 4= Agree and 5= strongly Agree)**

| **No.** | **Statements** | **1** | **2** | **3** | **4** | **5** |
| --- | --- | --- | --- | --- | --- | --- |
| 1. | Medicines are consistently available in this hospital. |  |  |  |  |  |
| 2. | Stock-outs of essential medicines are rare in this hospital. |  |  |  |  |  |
| 3. | Procurement practices in this hospital minimize medicine costs without compromising quality. |  |  |  |  |  |
| 4. | The hospital consistently achieves value for money in medicine procurement. |  |  |  |  |  |
| 5. | Medicines procured by this hospital meet quality standards. |  |  |  |  |  |
| 6. | Procurement practices ensure that counterfeit or substandard medicines are avoided. |  |  |  |  |  |
